# Supplementary material for: Deep ice as a geochemical reactor: insights from iron speciation and mineralogy of dust in the Talos Dome ice core (East Antarctica)
Source: Copernicus journal article supplement (doi:10.5194/tc-15-4807-2021), 2021-10-12
Supplement: Supplementary file 1 [file tc-15-4807-2021-supplement.zip]

Archive with 4 entries (3 files):
- SupplementaryFinal/
- SupplementaryFinal/CompleteData.ods
- SupplementaryFinal/Supplementary_Baccolo.pdf
- tc-15-4807-2021-supplement-title-page.pdf
