# Supplementary material for: Deep ice as a geochemical reactor: insights from iron speciation and mineralogy of dust in the Talos Dome ice core (East Antarctica)
Source: Copernicus journal article supplement (doi:10.5194/tc-15-4807-2021), 2021-10-12
Supplement: Supplementary file 1 [file tc-15-4807-2021-supplement.zip › SupplementaryFinal/CompleteData.ods]

## Sheet: Sample_Info
Sample Name	Mean Depth (m)	Mean Age (yr BP)	N. of ice sections	mean dust conc. (ngdust g-1ice)	err. (ngdust g-1ice)	total filtered vol. (mL)	Climatic Period	Extracted dust (µg)	Err. (µg)
TD-0269	0269	3202	7	28	2	194.2	Holocene	5.3	0.4
TD-0336	0336	4335	10	24	2	277.8	Holocene	6.8	0.6
TD-0385	0385	5258	5	53	4	138.5	Holocene	7.4	0.6
TD-0422	0422	5989	6	25	3	147.8	Holocene	3.7	0.5
TD-0535	0535	8424	5	19	3	121.1	Holocene	2.3	0.4
TD-0649	0649	11125	7	22	6	77.3	Holocene	1.7	0.5
TD-0666	0666	11526	10	21	4	123.6	Holocene	2.6	0.5
TD-0670	0670	12252	5	36	3	133.3	Deglaciation	4.8	0.4
TD-0694	0694	13867	5	33	3	106.3	Deglaciation	3.5	0.4
TD-0740	0740	15318	4	31	2	117.9	Deglaciation	3.7	0.3
TD-0777	0777	15726	2	75	5	55.8	Deglaciation	4.2	0.3
TD-0786	0786	16318	5	245	37	39.3	Deglaciation	9.6	1.5
TD-0798	0798	17871	4	75	9	62.7	Deglaciation	4.7	0.6
TD-0825	0825	18072	1	423	21	20.2	Deglaciation	8.6	0.5
TD-0828	0828	19163	2	202	14	36.1	MIS2	7.3	0.6
TD-0843	0843	20306	3	324	27	58.6	MIS2	19	1.8
TD-0857	0857	22490	1	473	41	10.2	MIS2	4.8	0.5
TD-0879	0879	27709	2	251	12	39.8	MIS2	10.9	0.6
TD-0927	0927	30843	3	390	56	45.3	MIS2	17.7	2.7
TD-0960	0960	36731	6	101	12	49.9	MIS3	3.9	0.5
TD-1025	1025	37350	3	253	17	67.6	MIS3	17.1	1.3
TD-1033	1033	37936	3	27	5	42.9	MIS3	1.2	0.2
TD-1041	1041	39353	3	26	4	49.8	MIS3	1.3	0.2
TD-1063	1063	40013	3	34	5	38.8	MIS3	1.3	0.2
TD-1072	1072	40654	4	47	6	56.4	MIS3	2.6	0.4
TD-1081	1081	41830	3	56	6	52.0	MIS3	2.9	0.3
TD-1096	1096	41913	4	89	5	117.4	MIS3	10.4	0.7
TD-1097	1097	43269	4	74	10	37.8	MIS3	2.8	0.4
TD-1112	1112	45003	4	44	4	71.9	MIS3	3.2	0.3
TD-1132	1132	47285	4	75	5	111.2	MIS3	8.4	0.6
TD-1163	1163	48809	3	46	5	46.5	MIS3	4.1	0.3
TD-1178	1178	49297	2	76	12	51.0	MIS3	2.2	0.7
TD-1182	1182	51929	4	73	6	54.1	MIS3	3.9	0.2
TD-1227	1227	55037	3	52	6	37.3	MIS3	1.9	4.1
TD-1265	1265	60866	2	1214	148	32.5	MIS4	32.5	1.2
TD-1289	1289	66690	2	191	10	48.4	MIS4	9.3	0.8
TD-1293	1293	68095	2	239	12	55.0	MIS5	13.2	0.5
TD-1297	1297	78249	2	140	7	55.4	MIS5	7.8	0.4
TD-1361	1361	99146	4	64	9	106.4	MIS5	6.7	1.0
TD-1385	1385	115573	5	48	5	138.2	MIS5	6.6	0.4
TD-1389	1389	118083	6	21	2	158.4	MIS5	3.4	0.4
TD-1415	1415	130802	5	31	4	123.8	MIS5	3.8	0.5
TD-1437	1437	152617	1	103	7	30.7	MIS6	3.1	0.2
TD-1443	1443	154919	1	220	20	24.4	MIS6	5.3	0.5
TD-1454	1454	162848	2	98	5	61.3	MIS6	6.0	0.4
TD-1491	1491	187074	3	33	2	83.7	MIS7	2.8	0.2
TD-1514	1514	228829	2	65	2	35.5	MIS7	2.3	0.1
TD-1530	1530	271732	1	230	30	16.7	MIS8	3.8	0.5
TD-1536	1536	294820	1	85	12	27.5	MIS9	2.3	0.3
TD-1554	1554	not dated	1	133	12	29.1	n.a.	3.9	0.4
TD-1555	1555	not dated	1	143	4	34.8	n.a.	5.0	0.2
TD-1576	1576	not dated	3	32	2	97.7	n.a.	3.1	0.2
TD-1592	1592	not dated	4	30	2	109.6	n.a.	3.3	0.3
TD-1609	1609	not dated	3	42	6	80.5	n.a.	3.4	0.5
	AICC2012 Chronology		Veres et al. (2013) Climate of the Past 9:1733-1748			Bazin et al. (2013) Climate of the Past 9:1715-1731
	TALDICE-DEEP		Crotti et al. (2021) Quaternary Science Reviews 266:107078

## Sheet: Elemental_Composition
Sample Name	Na2O%	MgO%	Al2O3%	SiO2%	K2O%	CaO%	TiO2%	MnO%	Fe2O3%
TD-0269	4.1	1.2	16.3	68.2	1.9	1.5	1.0	0.08	5.8
TD-0336	2.0	2.0	25.3	60.3	1.4	1.7	2.1	0.05	5.1
TD-0385	3.2	1.3	19.5	65.3	1.8	1.3	1.5	0.04	6.1
TD-0422	4.2	1.4	27.1	57.3	1.2	1.6	1.7	0.05	5.5
TD-0535	2.0	2.1	15.2	68.6	1.6	2.4	1.5	0.07	6.7
TD-0649	2.0	1.2	23.0	60.7	1.5	1.9	5.1	0.05	4.7
TD-0666	3.3	0.5	9.5	81.1	1.1	0.7	0.6	0.02	3.0
TD-0670	2.6	3.3	18.6	65.3	1.4	1.4	1.4	0.05	5.8
TD-0694	3.1	1.1	17.4	69.2	1.7	0.8	1.1	0.03	5.6
TD-0740	2.8	2.0	17.6	65.2	2.5	2.3	1.5	0.06	6.1
TD-0777	0.1	1.9	22.2	63.3	2.5	0.9	1.1	0.05	8.0
TD-0786	2.0	1.5	26.1	61.4	1.4	1.3	1.1	0.04	5.2
TD-0798	1.4	2.3	20.0	64.8	1.9	1.7	1.3	0.07	6.5
TD-0825	1.7	3.7	23.2	61.9	1.7	1.1	1.0	0.06	5.6
TD-0828	1.8	4.1	23.7	61.0	1.8	1.1	1.0	0.07	5.5
TD-0843	2.0	5.7	25.1	58.5	1.6	1.0	0.9	0.06	5.1
TD-0857	1.8	2.5	25.0	60.0	1.6	0.9	1.3	0.09	6.9
TD-0879	2.6	1.5	18.6	66.6	1.9	1.7	1.0	0.06	6.0
TD-0927	1.2	1.6	21.8	65.9	2.1	1.0	0.8	0.04	5.6
TD-0960	2.0	2.9	24.0	65.2	1.3	0.6	0.6	0.02	3.5
TD-1025	2.7	0.8	16.3	71.4	1.9	0.9	0.9	0.03	5.1
TD-1033	1.2	0.3	14.3	75.4	1.8	0.9	1.1	0.03	4.9
TD-1041	2.5	1.1	15.3	68.7	2.1	2.0	1.3	0.11	6.9
TD-1063	2.0	1.1	17.3	69.0	2.2	1.2	1.0	0.05	6.1
TD-1072	1.4	0.5	15.2	74.6	2.0	0.6	0.7	0.03	4.9
TD-1081	2.0	1.4	25.3	65.1	1.4	0.5	0.6	0.02	3.7
TD-1096	2.2	0.8	15.1	72.5	1.7	1.3	1.0	0.04	5.3
TD-1097	1.9	0.6	16.3	72.8	2.0	0.7	0.8	0.02	5.0
TD-1112	1.6	0.8	15.6	72.2	2.1	0.9	1.0	0.03	5.8
TD-1132	2.9	1.0	14.0	72.8	3.1	1.0	0.7	0.05	4.4
TD-1163	1.7	0.4	10.6	77.7	2.4	0.5	0.9	0.04	5.6
TD-1178	2.0	0.7	24.4	66.4	1.5	0.4	0.6	0.02	4.0
TD-1182	1.7	0.5	14.0	75.8	1.8	0.6	0.9	0.02	4.7
TD-1227	1.7	0.7	14.4	74.0	1.8	0.8	1.2	0.05	5.4
TD-1265	6.7	0.0	17.6	67.1	3.8	0.6	0.2	0.08	4.0
TD-1289	2.0	1.6	29.4	60.7	1.4	0.3	0.5	0.02	4.1
TD-1293	3.2	0.9	19.8	67.0	2.1	0.9	0.8	0.04	5.3
TD-1297	1.5	0.7	17.8	71.5	2.2	0.4	0.6	0.02	5.2
TD-1361	3.5	0.3	12.0	75.3	2.0	0.2	1.0	0.02	5.5
TD-1385	2.0	0.2	16.6	72.1	3.2	0.5	0.6	0.06	4.7
TD-1389	2.8	0.1	10.3	76.7	2.0	0.3	1.3	0.03	6.4
TD-1415	0.9	0.1	11.7	77.4	2.3	0.4	1.1	0.05	6.1
TD-1437	0.2	0.5	17.2	72.9	2.5	0.3	0.8	0.04	5.6
TD-1443	1.7	0.4	21.4	67.6	3.2	0.5	0.6	0.06	4.7
TD-1454	0.2	0.5	17.8	71.8	2.6	0.2	0.8	0.03	6.0
TD-1491	2.2	0.1	9.0	79.6	1.9	0.1	1.0	0.02	6.0
TD-1514	2.7	0.0	14.8	73.8	2.3	0.3	0.7	0.04	5.4
TD-1530	2.6	0.9	21.3	65.1	2.7	0.3	0.9	0.04	6.0
TD-1536	2.7	3.0	11.7	71.4	2.8	0.8	1.2	0.03	6.4
TD-1554	0.8	0.6	15.7	72.7	2.4	1.1	1.2	0.04	5.6
TD-1555	1.1	0.5	14.9	72.3	2.8	0.3	1.2	0.04	6.8
TD-1576	1.0	0.2	7.2	77.5	2.2	0.3	1.3	0.07	10.3
TD-1592	0.9	0.2	7.7	84.0	1.4	0.2	0.8	0.02	4.7
TD-1609	2.0	0.1	7.4	80.0	1.9	0.2	1.0	0.03	7.3

## Sheet: XANES_Data
Sample Name	Climatic Period	Age (yr BP)	Fe K-edge Pre-Edge Peak				Fe K-edge
			Centroid Energy (eV)	Error (eV)	Integral Area (arb. unit)	Error (arb. unit)	Main Edge Energy (eV)	Error (eV)
TD-0269	holocene	3202	7113.7	0.5	0.13	0.09	7124.82	0.13
TD-0336	holocene	4335	7113.7	0.5	0.14	0.04	7125.31	0.08
TD-0385	holocene	5258	7114.2	0.5	0.14	0.02	7124.91	0.16
TD-0422	holocene	5989	7113.2	0.5	0.13	0.03	7124.41	0.48
TD-0535	holocene	8424	7113.6	0.5	0.14	0.03	7125.10	0.10
TD-0649	holocene	11125	7114.0	0.5	0.15	0.03	7125.27	0.52
TD-0666	holocene	11526	7114.5	0.5	0.16	0.03	7126.22	0.22
TD-0670	deglaciation	12252	7114.5	0.5	0.17	0.05	7126.07	0.22
TD-0694	deglaciation	13867	7114.1	0.5	0.11	0.02	7125.81	0.21
TD-0740	deglaciation	15318	7113.8	0.5	0.12	0.03	7126.13	0.16
TD-0777	deglaciation	15726	7114.6	0.5	0.14	0.04	7125.42	0.14
TD-0786	deglaciation	16318	7113.8	0.5	0.13	0.04	7126.65	0.39
TD-0798	deglaciation	17871	7114.1	0.5	0.15	0.02	7125.28	0.27
TD-0825	deglaciation	18072	7113.9	0.5	0.13	0.03	7125.89	0.05
TD-0828	MIS2	19163	7113.7	0.5	0.12	0.03	7125.23	0.13
TD-0843	MIS2	20306	7114.1	0.5	0.14	0.02	7125.39	0.23
TD-0857	MIS2	22490	7113.8	0.5	0.12	0.03	7125.29	0.22
TD-0879	MIS2	27709	7113.8	0.5	0.12	0.02	7125.64	0.53
TD-0927	MIS2	30843	7113.6	0.5	0.08	0.02	7125.81	0.06
TD-0960	MIS3	36731	7113.9	0.5	0.14	0.05	7125.71	0.22
TD-1025	MIS3	37350	7114.3	0.5	0.16	0.03	7125.69	0.07
TD-1033	MIS3	37936	7114.5	0.5	0.15	0.04	7126.64	0.35
TD-1041	MIS3	39353	7114.4	0.5	0.18	0.03	7126.95	0.22
TD-1063	MIS3	40013	7114.1	0.5	0.14	0.03	7126.20	0.68
TD-1072	MIS3	40654	7114.7	0.5	0.16	0.06	7126.01	0.28
TD-1081	MIS3	41830	7114.4	0.5	0.13	0.03	7126.67	0.22
TD-1096	MIS3	41913	7114.7	0.5	0.20	0.06	7126.79	0.28
TD-1097	MIS3	43269	7113.9	0.5	0.10	0.05	7126.51	0.11
TD-1112	MIS3	45003	7114.6	0.5	0.17	0.06	7126.11	0.22
TD-1132	MIS3	47285	7113.9	0.5	0.13	0.04	7126.52	0.22
TD-1163	MIS3	48809	7114.1	0.5	0.13	0.04	7125.84	0.22
TD-1178	MIS3	49297	7114.5	0.5	0.14	0.04	7126.28	0.22
TD-1182	MIS3	51929	7114.5	0.5	0.13	0.08	7126.78	0.55
TD-1227	MIS3	55037	7114.2	0.5	0.13	0.06	7126.77	0.36
TD-1265	MIS4	60866	7114.2	0.5	0.22	0.01	7126.41	0.22
TD-1289	MIS4	66690	7114.0	0.5	0.08	0.03	7125.71	0.13
TD-1293	MIS5	68095	7114.1	0.5	0.09	0.02	7126.00	0.13
TD-1318	MIS5	78249	7114.2	0.5	0.09	0.03	7126.93	0.35
TD-1361	MIS5	99146	7114.3	0.5	0.08	0.03	7127.03	0.10
TD-1385	MIS5	115573	7114.3	0.5	0.11	0.02	7126.65	0.06
TD-1389	MIS5	118083	7113.9	0.5	0.12	0.01	7126.73	0.10
TD-1415	MIS5	130802	7114.9	0.5	0.10	0.25	7127.29	0.12
TD-1437	MIS6	152617	7114.2	0.5	0.10	0.03	7127.13	0.08
TD-1443	deep	not dated	7114.4	0.5	0.10	0.03	7126.34	0.21
TD-1454	deep	not dated	7114.6	0.5	0.10	0.03	7127.34	0.13
TD-1491	deep	not dated	7114.9	0.5	0.12	0.12	7127.38	0.08
TD-1514	deep	not dated	7114.6	0.5	0.12	0.08	7127.08	0.11
TD-1530	deep	not dated	7114.9	0.5	0.10	0.07	7127.40	0.15
TD-1536	deep	not dated	7114.7	0.5	0.12	0.05	7127.39	0.08
TD-1554	n.a.	not dated	7114.9	0.5	0.14	0.08	7127.17	0.14
TD-1555	n.a.	not dated	7114.3	0.5	0.08	0.05	7127.32	0.24
TD-1576	n.a.	not dated	7114.4	0.5	0.08	0.03	7127.46	0.21
TD-1592	n.a.	not dated	7114.3	0.5	0.09	0.03	7127.42	0.01
TD-1609	n.a.	not dated	7114.6	0.5	0.10	0.06	7127.38	0.08

## Sheet: Fe-Minerals_#1
Sample Name	Minerals selcted in the linear combination	Linear Coefficients	Error
TD-0269	Horneblende	0.422	0.008
	Goethite	0.292	0.048
	Hematite	0.236	0.047
	Pyrite	0.050	0.008
TD-0336	Hematite	0.458	0.052
	Horneblende	0.273	0.091
	Goethite	0.201	0.052
	Pyrite	0.068	0.052
TD-0385	Hematite	0.406	0.024
	Schoerlite	0.289	0.03
	Horneblende	0.253	0.049
	Pyrite	0.052	0.007
TD-0422	Horneblende	0.399	0.009
	Goethite	0.386	0.057
	Pyrite	0.117	0.006
	Siderite	0.099	0.007
TD-0535	Goethite	0.365	0.011
	Magnetite	0.333	0.018
	Pargasite	0.234	0.012
	Siderite	0.067	0.026
TD-0649	Muscovite	0.499	0.022
	Goethite	0.319	0.011
	Olivine	0.116	0.011
	Pyrite	0.066	0.011
TD-0666	Goethite	0.595	0.016
	Muscovite	0.309	0.018
	Pyrite	0.06	0.006
	Siderite	0.036	0.027
TD-0694	Goethite	0.714	0.01
	Horneblende	0.162	0.401
	Siderite	0.076	0.011
	Pyrite	0.048	0.01
TD-0740	Goethite	0.784	0.008
	Horneblende	0.132	0.013
	Siderite	0.065	0.021
	Pyrite	0.019	0.08
TD-0777	Goethite	0.363	0.047
	Hematite	0.302	0.047
	Horneblende	0.294	0.047
	Pyrite	0.041	0.093
TD-0786	Goethite	0.626	0.064
	Hematite	0.198	0.091
	Muscovite	0.116	0.043
	Chlorite	0.059	0.016
TD-0798	Muscovite	0.453	0.048
	Goethite	0.259	0.017
	Magnetite	0.227	0.016
	Siderite	0.062	0.006
TD-0825	Goethite	0.616	0.05
	Muscovite	0.205	0.036
	Horneblende	0.147	0.018
	Siderite	0.031	0.009
TD-0828	Goethite	0.341	0.039
	Horneblende	0.331	0.061
	Hematite	0.305	0.046
	Pyrite	0.023	0.008
TD-0843	Muscovite	0.305	0.019
	Goethite	0.256	0.01
	Hematite	0.24	0.01
	Biotite	0.199	0.01
TD-0857	Hematite	0.311	0.029
	Horneblende	0.251	0.009
	Goethite	0.24	0.029
	Muscovite	0.197	0.02
TD-0879	Goethite	0.557	0.025
	Muscovite	0.244	0.037
	Horneblende	0.177	0.177
	Siderite	0.021	0.01
TD-0927	Goethite	0.477	0.059
	Horneblende	0.196	0.015
	Hematite	0.175	0.045
	Muscovite	0.152	0.034
TD-0960	Goethite	0.561	0.02
	Muscovite	0.26	0.027
	Chlorite	0.154	0.051
	Siderite	0.025	0.007
TD-1025	Goethite	0.48	0.028
	Muscovite	0.344	0.025
	Olivine	0.104	0.008
	Pyrite	0.072	0.006
TD-1033	Goethite	0.715	0.035
	Muscovite	0.225	0.022
	Jarosite	0.035	0.067
	Siderite	0.024	0.007
TD-1041	Goethite	0.47	0.029
	Jarosite	0.348	0.023
	Muscovite	0.153	0.018
	Siderite	0.029	0.006
TD-1063	Goethite	0.783	0.005
	Pargasite	0.142	0.008
	Siderite	0.056	0.005
	Pyrite	0.019	0.016
TD-1072	Goethite	0.707	0.018
	Magnetite	0.134	0.029
	Horneblende	0.093	0.017
	Siderite	0.065	0.038
TD-1081	Goethite	0.699	0.034
	Muscovite	0.16	0.022
	Jarosite	0.101	0.064
	Siderite	0.041	0.007
TD-1096	Goethite	0.524	0.047
	Jarosite	0.356	0.032
	Horneblende	0.094	0.012
	Siderite	0.027	0.008
TD-1097	Goethite	0.811	0.009
	Pargasite	0.101	0.014
	Siderite	0.057	0.083
	Pyrite	0.032	0.008
TD-1112	Goethite	0.756	0.005
	Pargasite	0.138	0.007
	Siderite	0.063	0.004
	Pyrite	0.043	0.009
TD-1132	Goethite	0.279	0.069
	Muscovite	0.276	0.012
	Hematite	0.241	0.041
	Jarosite	0.204	0.027
TD-1163	goethite	0.694	0.055
	Horneblende	0.141	0.009
	Pyrite	0.102	0.006
	Siderite	0.063	0.006
TD-1178	Goethite	0.798	0.008
	Horneblende	0.094	0.012
	Siderite	0.067	0.009
	Pyrite	0.04	0.021
TD-1182	Jarosite	0.507	0.021
	Muscovite	0.268	0.01
	Hematite	0.18	0.016
	Pyrite	0.045	0.004
TD-1203	Goethite	0.927	0.055
	Siderite	0.044	0.01
	Chlorite	0.017	0.012
	Pyrite	0.012	0.01
TD-1227	Goethite	0.439	0.025
	Muscovite	0.396	0.016
	Jarosite	0.13	0.031
	Siderite	0.034	0.037
TD-1265	Magnetite	0.704	0.038
	Jarosite	0.192	0.019
	Pyrite	0.066	0.017
	Siderite	0.038	0.059
TD-1289	Goethite	0.616	0.058
	Muscovite	0.152	0.036
	Chlorite	0.139	0.015
	Jarosite	0.093	0.04
TD-1293	Goethite	0.53	0.044
	Jarosite	0.235	0.078
	Horneblende	0.134	0.022
	Muscovite	0.101	0.044
TD-1318	Goethite	0.573	0.044
	Jarosite	0.327	0.04
	Horneblende	0.073	0.016
	Siderite	0.027	0.01
TD-1385	Jarosite	0.349	0.041
	Goethite	0.316	0.06
	Magnetite	0.28	0.081
	Siderite	0.054	0.007
TD-1389	Jarosite	0.658	0.048
	Goethite	0.31	0.05
	Pyrite	0.033	0.014
TD-1415	Goethite	0.544	0.041
	Jarosite	0.371	0.043
	Pyrite	0.062	0.011
	Siderite	0.023	0.068
TD-1437	Jarosite	0.581	0.029
	Goethite	0.317	0.067
	Horneblende	0.084	0.007
	Pyrite	0.017	0.006
TD-1443	Goethite	0.781	0.015
	Pyrite	0.093	0.007
	Horneblende	0.081	0.011
	Siderite	0.046	0.008
TD-1454	Jarosite	0.639	0.037
	Goethite	0.317	0.04
	Chlorite	0.042	0.012
	Siderite	0.002	0.009
TD-1491	Jarosite	0.687	0.048
	Goethite	0.266	0.044
	Chlorite	0.036	0.012
	Siderite	0.01	0.009
TD-1514	Goethite	0.46	0.045
	Jarosite	0.423	0.037
	Chlorite	0.073	0.119
	Pyrite	0.043	0.008
TD-1530	Goethite	0.659	0.05
	Jarosite	0.34	0.049
	Siderite	0.002	0.009
TD-1536	Jarosite	0.515	0.046
	Goethite	0.466	0.048
	Pyrite	0.019	0.011
TD-1554	Jarosite	0.533	0.04
	Goethite	0.337	0.058
	Magnetite	0.104	0.026
	Siderite	0.026	0.086
TD-1555	Jarosite	0.497	0.055
	Goethite	0.441	0.051
	Pyrite	0.032	0.011
	Siderite	0.03	0.008
TD-1576	Jarosite	0.568	0.045
	Goethite	0.398	0.075
	Pyrite	0.032	0.011
	Siderite	0.002	0.008
TD-1592	Jarosite	0.654	0.063
	Goethite	0.305	0.061
	Chlorite	0.037	0.01
	Pyrite	0.004	0.011
TD-1609	Jarosite	0.675	0.047
	Goethite	0.287	0.058
	Chlorite	0.035	0.01
	Pyrite	0.002	0.075

## Sheet: Fe-Minerals_#2
Depth (m)	Sample Name	Climatic Period	Dept (m)	Hornblende		Shoerlite		Pargasite		Olivine		Chlorite		Biotite		Muscovite		Siderite		Magnetite		Goethite		Hematite		Pyrite		Jarosite		Weathering INDEX
269	TD-0269	holocene	0269	42.2	0.8	-	-	-	-	-	-	-	-	-	-	-	-	-	-	-	-	41.3	4.8	11.5	4.7	5	0.8	-	-	0.0
336	TD-0336	holocene	0336	33.4	9.1	-	-	-	-	-	-	-	-	-	-	-	-	-	-	-	-	46.3	5.2	13.5	5.2	6.8	5.2	-	-	0.0
385	TD-0385	holocene	0385	25.3	4.9	28.9	0.3	-	-	-	-	-	-	-	-	-	-	-	-	-	-	25.4	-	15.2	2.4	5.2	0.7	-	-	0.0
422	TD-0422	holocene	0422	39.9	0.9	-	-	-	-	-	-	-	-	-	-	-	-	9.9	0.7	-	-	38.6	5.7	0	-	11.7	0.6	-	-	0.0
535	TD-0535	holocene	0535	-	-	-	-	23.4	1.2	-	-	-	-	-	-	-	-	6.7	2.6	33.3	1.8	36.5	1.1	0	-	-	-	-	-	0.0
649	TD-0649	holocene	0649	-	-	-	-	-	-	11.6	1.1	-	-	-	-	49.9	2.2	-	-	-	-	31.9	1.1	0	-	6.6	1.1	-	-	0.0
666	TD-0666	holocene	0666	-	-	-	-	-	-	-	-	-	-	-	-	30.9	1.8	3.6	2.7	-	-	59.5	1.6	0	-	6	0.6	-	-	0.0
694	TD-0694	deglaciation	0694	16.2	4.1	-	-	-	-	-	-	-	-	-	-	-	-	7.6	1.1	-	-	71.4	1	-	-	4.8	1	-	-	0.0
740	TD-0740	deglaciation	0740	13.2	1.3	-	-	-	-	-	-	-	-	-	-	-	-	6.5	2.1	-	-	78.4	0.8	-	-	1.9	0.8	-	-	0.0
777	TD-0777	deglaciation	0777	29.4	4.7	-	-	-	-	-	-	-	-	-	-	-	-	-	-	-	-	36.3	4.7	30.2	4.7	4.1	3	-	-	0.0
786	TD-0786	deglaciation	0786	-	-	-	-	-	-	-	-	5.9	4.6	-	-	11.6	4.3	-	-	-	-	62.6	6.4	19.8	9.1	-	-	-	-	0.0
798	TD-0798	deglaciation	0798	-	-	-	-	-	-	-	-	-	-	-	-	45.3	4.8	6.2	0.6	22.7	1.6	25.9	1.7	-	-	-	-	-	-	0.0
825	TD-0825	deglaciation	0825	14.7	1.8	-	-	-	-	-	-	-	-	-	-	20.5	3.2	3.1	0.9	-	-	61.6	5	-	-	-	-	-	-	0.0
828	TD-0828	MIS2	0828	33.1	6.1	-	-	-	-	-	-	-	-	-	-	-	-	-	-	-	-	34.1	3.9	30.5	4.6	2.3	0.8	-	-	0.0
843	TD-0843	MIS2	0843	-	-	-	-	-	-	-	-	-	-	19.9	1.1	30.5	1.9	-	-	-	-	25.6	1	24	1	-	-	-	-	0.0
857	TD-0857	MIS2	0857	25.1	0.9	-	-	-	-	-	-	-	-	-	-	19.7	2	-	-	-	-	24	2.9	31.1	2.9	-	-	-	-	0.0
879	TD-0879	MIS2	0879	17.7	4.3	-	-	-	-	-	-	-	-	-	-	24.4	3.7	2.1	1	-	-	55.7	2.5	-	-	-	-	-	-	0.0
927	TD-0927	MIS2	0927	19.6	1.5	-	-	-	-	-	-	-	-	-	-	15.2	3.4	-	-	-	-	47.7	5.9	17.5	4.5	-	-	-	-	0.0
960	TD-0960	MIS3	0960	-	-	-	-	-	-	-	-	15.4	5.1	-	-	26	2.7	2.5	0.7	-	-	56.1	2	-	-	-	-	-	-	0.0
1025	TD-1025	MIS3	1025	-	-	-	-	-	-	10.4	0.8	-	-	-	-	34.4	2.5	7.2	0.6	-	-	48	2.8	-	-	-	-	-	-	0.0
1033	TD-1033	MIS3	1033	-	-	-	-	-	-	-	-	-	-	-	-	22.5	2.2	2.4	0.7	-	-	71.5	3.5	-	-	-	-	3.5	6.7	13.5
1041	TD-1041	MIS3	1041	-	-	-	-	-	-	-	-	-	-	-	-	15.3	1.8	2.9	0.6	-	-	47	2.9	-	-	-	-	34.8	2.3	69.5
1063	TD-1063	MIS3	1063	-	-	-	-	14.2	0.8	-	-	-	-	-	-	-	-	5.6	0.5	-	-	78.3	0.5	-	-	1.9	1.6	-	-	0.0
1072	TD-1072	MIS3	1072	9.3	1.7	-	-	-	-	-	-	-	-	-	-	-	-	6.5	3.8	13.4	2.9	70.7	1.8	-	-	-	-	-	-	0.0
1081	TD-1081	MIS3	1081	-	-	-	-	-	-	-	-	-	-	-	-	16	2.2	4.1	0.7	-	-	69.9	3.4	-	-	-	-	10.1	6.5	38.7
1096	TD-1096	MIS3	1096	9.4	1.2	-	-	-	-	-	-	-	-	-	-	-	-	2.7	0.8	-	-	52.4	4.7	-	-	-	-	35.6	3.2	79.1
1097	TD-1097	MIS3	1097	-	-	-	-	10.1	1.4	-	-	-	-	-	-	-	-	5.7	8.3	-	-	81.1	0.9	-	-	3.2	0.8	-	-	0.0
1112	TD-1112	MIS3	1112	-	-	-	-	13.8	0.7	-	-	-	-	-	-	-	-	6.3	0.4	-	-	75.6	0.5	-	-	4.3	0.9	-	-	0.0
1132	TD-1132	MIS3	1132	-	-	-	-	-	-	-	-	-	-	-	-	27.6	1.2	-	-	-	-	27.9	0.9	24.1	4.1	-	-	20.4	2.7	28.3
1163	TD-1163	MIS3	1163	14.1	0.9	-	-	-	-	-	-	-	-	-	-	-	-	6.3	0.6	-	-	69.4	5.5	-	-	10.2	0.6	-	-	0.0
1178	TD-1178	MIS3	1178	9.4	1.2	-	-	-	-	-	-	-	-	-	-	-	-	6.7	0.9	-	-	79.8	0.8	-	-	4	2.1	-	-	0.0
1182	TD-1182	MIS3	1182	-	-	-	-	-	-	-	-	-	-	-	-	26.8	1	-	-	-	-	-	-	18	1.6	4.5	0.4	50.7	2.1	53.1
1203	TD-1203	MIS3	1203	-	-	-	-	-	-	-	-	1.7	1.2	-	-	-	-	4.4	1	-	-	92.7	5.5	-	-	1.2	0.1	-	-	0.0
1227	TD-1227	MIS3	1227	-	-	-	-	-	-	-	-	-	-	-	-	39.6	1.6	3.4	3.7	-	-	43.9	2.5	-	-	-	-	13	3.1	24.7
1265	TD-1265	MIS4	1265	-	-	-	-	-	-	-	-	-	-	-	-	-	-	3.8	5.9	70.4	3.8	-	-	-	-	6.6	1.7	19.2	1.9	100.0
1289	TD-1289	MIS4	1289	-	-	-	-	-	-	-	-	13.9	1.5	-	-	15.2	3.6	-	-	-	-	61.6	5.8	-	-	-	-	9.3	4	38.0
1293	TD-1293	MIS5	1293	13.4	2.2	-	-	-	-	-	-	-	-	-	-	10.1	4.4	-	-	-	-	53	4.4	-	-	-	-	23.5	7.8	50.0
1318	TD-1318	MIS5	1318	7.3	1.6	-	-	-	-	-	-	-	-	-	-	-	-	2.7	1	-	-	57.3	4.4	-	-	-	-	32.7	4	81.8
1385	TD-1361	MIS5	1361	-	-	-	-	-	-	-	-	-	-	-	-	-	-	5.4	0.7	28	8.1	31.6	6	-	-	-	-	34.9	4.1	100.0
1389	TD-1389	MIS5	1389	-	-	-	-	-	-	-	-	-	-	-	-	-	-	-	-	-	-	31	5	-	-	3.3	1.4	65.8	4.8	100.0
1415	TD-1415	MIS5	1415	-	-	-	-	-	-	-	-	-	-	-	-	-	-	2.3	6.8	-	-	54.4	4.1	-	-	6.2	1.1	37.1	4.3	100.0
1437	TD-1437	MIS6	1437	8.4	0.7	-	-	-	-	-	-	-	-	-	-	-	-	-	-	-	-	31.7	6.7	-	-	1.7	0.6	58.1	2.9	87.4
1443	TD-1443	deep	1443	8.1	1.1	-	-	-	-	-	-	-	-	-	-	-	-	4.6	0.8	-	-	78.1	1.5	-	-	9.3	0.7	0	-	0.0
1454	TD-1454	deep	1454	-	-	-	-	-	-	-	-	4.2	1.2	-	-	-	-	-	-	-	-	31.7	4	-	-	0.2	0.9	63.9	3.7	100.0
1491	TD-1491	deep	1491	-	-	-	-	-	-	-	-	3.6	1.2	-	-	-	-	1	0.9	-	-	26.6	4.4	-	-	-	-	68.7	4.8	100.0
1514	TD-1514	deep	1514	-	-	-	-	-	-	-	-	7.3	1.9	-	-	-	-	-	-	-	-	46	4.5	-	-	4.3	0.8	42.3	3.7	100.0
1530	TD-1530	deep	1530	-	-	-	-	-	-	-	-	-	-	-	-	-	-	0.2	0.9	-	-	65.9	5	-	-	-	-	34	4.9	100.0
1536	TD-1536	deep	1536	-	-	-	-	-	-	-	-	-	-	-	-	-	-	-	-	-	-	46.6	4.8	-	-	1.9	1.1	51.5	4.6	100.0
1554	TD-1554	n.a.	1554	-	-	-	-	-	-	-	-	-	-	-	-	-	-	2.6	8.6	10.4	2.6	33.7	5.8	-	-	-	-	53.3	4	100.0
1555	TD-1555	n.a.	1555	-	-	-	-	-	-	-	-	-	-	-	-	-	-	3	0.8	-	-	44.1	5.1	-	-	3.2	1.1	49.7	5.5	100.0
1576	TD-1576	n.a.	1576	-	-	-	-	-	-	-	-	-	-	-	-	-	-	0.2	0.8	-	-	39.8	7.5	-	-	3.2	1.1	56.8	4.5	100.0
1592	TD-1592	n.a.	1592	-	-	-	-	-	-	-	-	3.7	1	-	-	-	-	-	-	-	-	30.5	6.1	-	-	0.4	1.1	65.4	6.3	100.0
1609	TD-1609	n.a.	1609	-	-	-	-	-	-	-	-	3.5	1	-	-	-	-	-	-	-	-	28.7	5.7	-	-	0.2	0.2	67.5	4.7	100.0
