# Supplementary material for: Deep ice as a geochemical reactor: insights from iron speciation and mineralogy of dust in the Talos Dome ice core (East Antarctica)
Source: Copernicus journal article supplement (doi:10.5194/tc-15-4807-2021), 2021-10-12
Supplement: Supplementary file 1 [file tc-15-4807-2021-supplement.zip › tc-15-4807-2021-supplement-title-page.pdf]

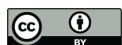

## *Supplement of*

# **Deep ice as a geochemical reactor: insights from iron speciation and mineralogy of dust in the Talos Dome ice core (East Antarctica)**

**Giovanni Baccolo et al.**

*Correspondence to:* Giovanni Baccolo ([giovanni.baccolo@unimib.it](mailto:giovanni.baccolo@unimib.it))

- [tc-15-4807-2021-supplement-title-page.pdf](#)
- [SupplementaryFinal](#)
  - [CompleteData.ods](#)
  - [Supplementary\\_Baccolo.pdf](#)

The copyright of individual parts of the supplement might differ from the article licence.
